# Supplementary material
Source: PubMed Central journal article supplement (PMC5548416)
Supplement: NIHMS881190-supplement-Supplemental_files.pdf [file NIHMS881190-supplement-Supplemental_files.pdf]

**Leveraging colloidal aggregation for drug-rich nanoparticle formulations**

Ahil N. Ganesh, Jennifer Logie, Christopher K. McLaughlin, Benjamin L. Barthel, Tad H. Koch, Brian K. Shoichet, Molly S. Shoichet

**Table S1** Critical micelle concentrations of polymers used to stabilize colloidal drug aggregates.

| Polymer  | Critical Micelle Concentration (% w/v) |
|----------|----------------------------------------|
| UP80     | 0.002%                                 |
| PLAC-PEG | 0.002%                                 |
| F127     | 0.3%                                   |
| F68      | 0.2%                                   |
| Brij 58  | 0.009%                                 |
| Brij L23 | 0.008%                                 |
| VitE-PEG | 0.02%                                  |

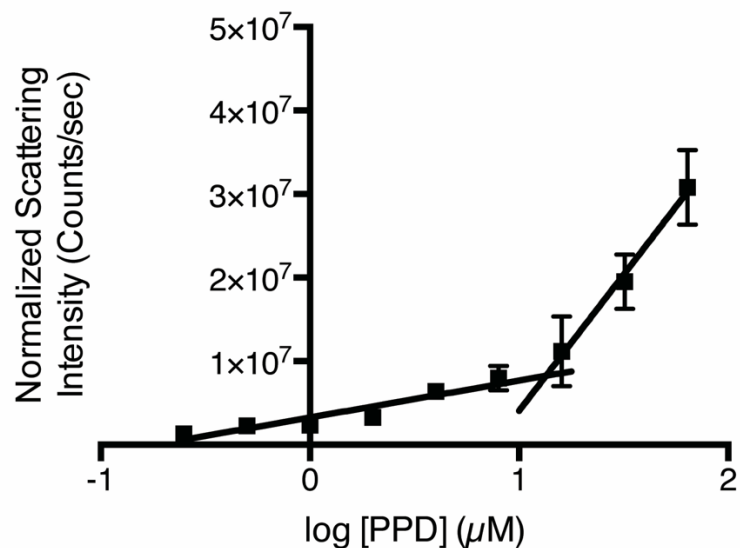**Figure S1** The critical aggregation concentration of PPD is 14  $\mu\text{M}$  in PBS as determined by dynamic light scattering. Formulations contain 2% DMF. (n=3, mean  $\pm$  SD).

Supporting Information

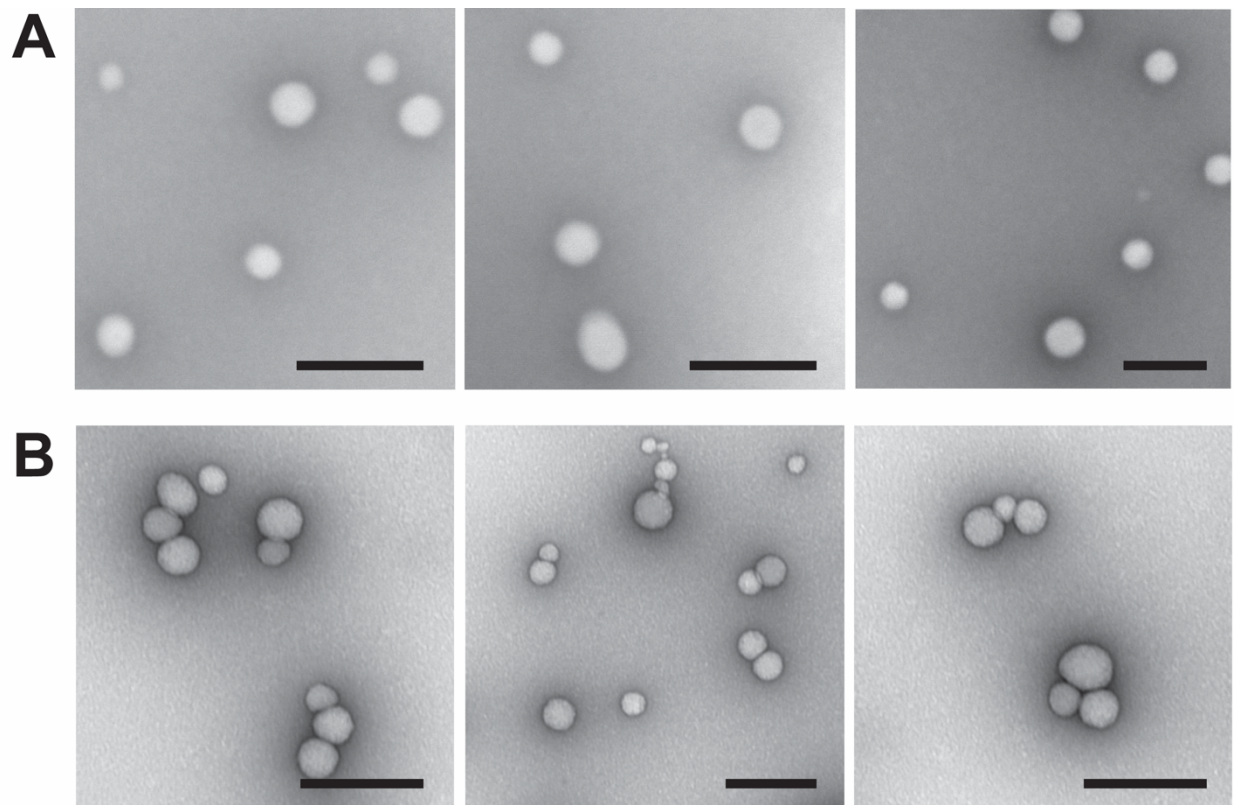

**Figure S2** Representative fields of view of (A) fulvestrant-UP80 and (B) PPD-PLAC-PEG colloids in PBS. Scale bar represents 200 nm.

Supporting Information

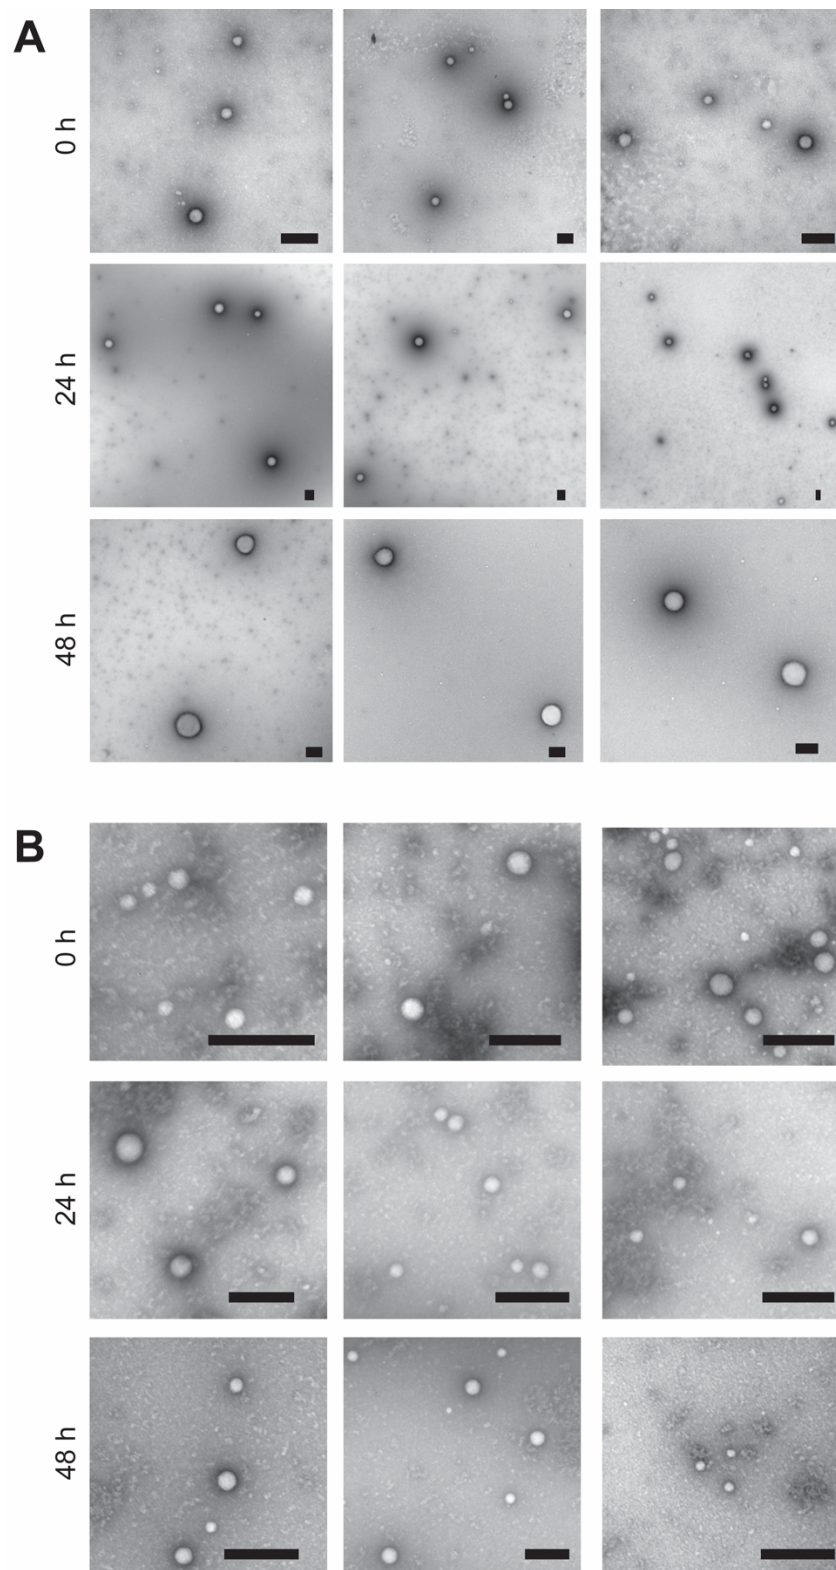

**Figure S3** Additional TEM fields of view for (A) fulvestrant-UP80 and (B) PPD-PLAC-PEG during incubation in 10% serum as a function of time. Scale bar represents 200 nm.

## Supporting Information

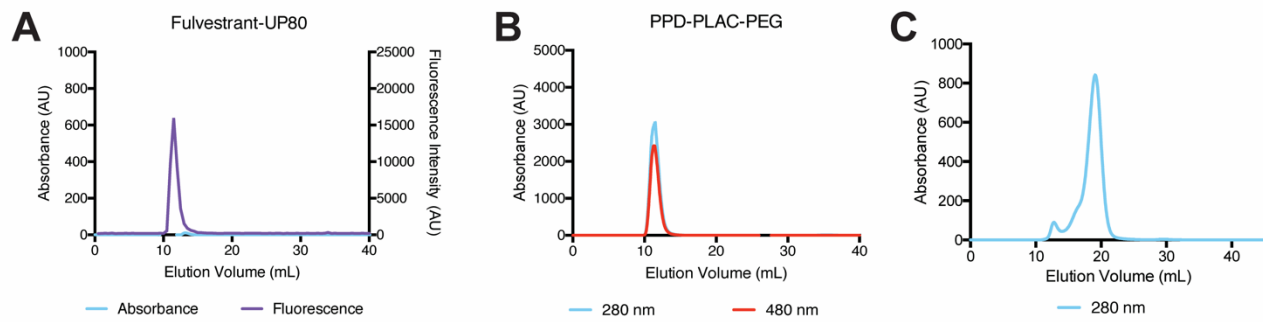

**Figure S4** Representative chromatograms of (A) fulvestrant-UP80, (B) PPD-PLAC-PEG and (C) 20% serum following size exclusion chromatography. Fulvestrant-UP80 and PPD-PLAC-PEG were separated in serum-free conditions.

## Supporting Information

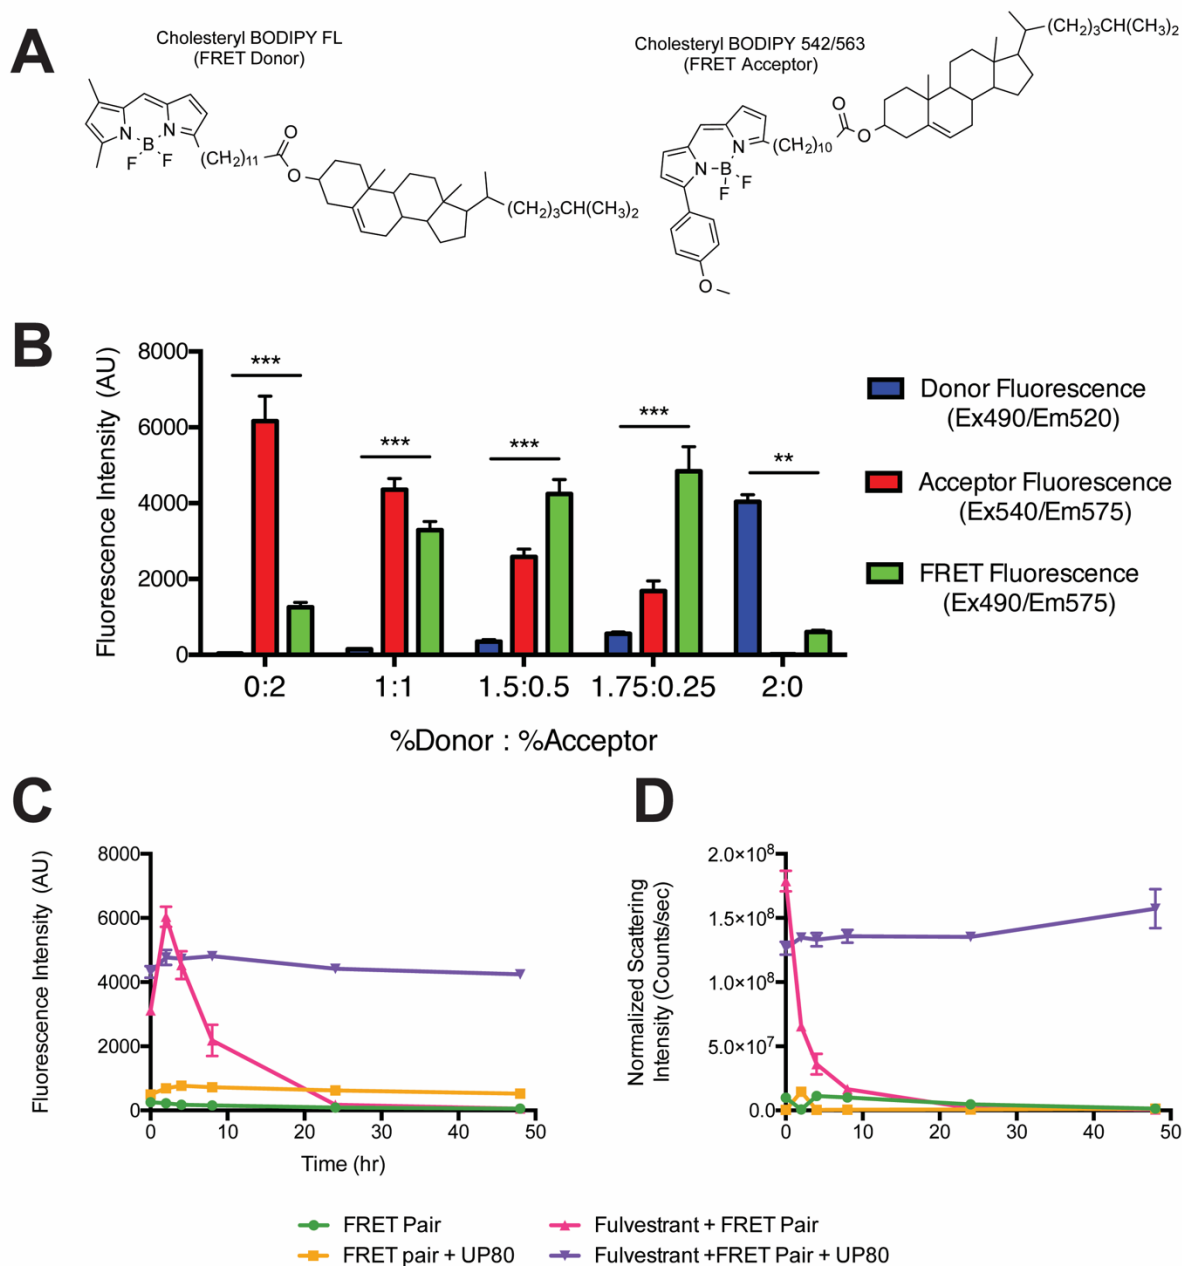

**Figure S5** (A) Structure of FRET pair of CholEsteryl BODIPY FL (Donor) and CholEsteryl BODIPY 542/563 (Acceptor). (B) Fluorescence properties of BODIPY dyes (2 mol%) co-formulated with 50  $\mu$ M fulvestrant and 0.001% UP80 in PBS. (n=3, mean $\pm$ SD, \*\* p<0.01, \*\*\*p<0.001 between donor, acceptor and FRET fluorescence within formulations) (C) Stability of fulvestrant-UP80 colloids in PBS measured by FRET fluorescence correlates with stability measured by (D) dynamic light scattering. Decrease in fluorescence and scattering intensity of non-stabilized colloids indicates crystallization and precipitation over time. UP80-stabilized colloids maintain fluorescence intensity, indicating an amorphous state throughout. Dye incorporation is unlikely within nanocrystalline particles. Formulations comprise 50  $\mu$ M fulvestrant, 1.75 mol% donor, 0.25 mol% acceptor, 0.001% UP80 in PBS (n=3, mean $\pm$ SD).

## Supporting Information

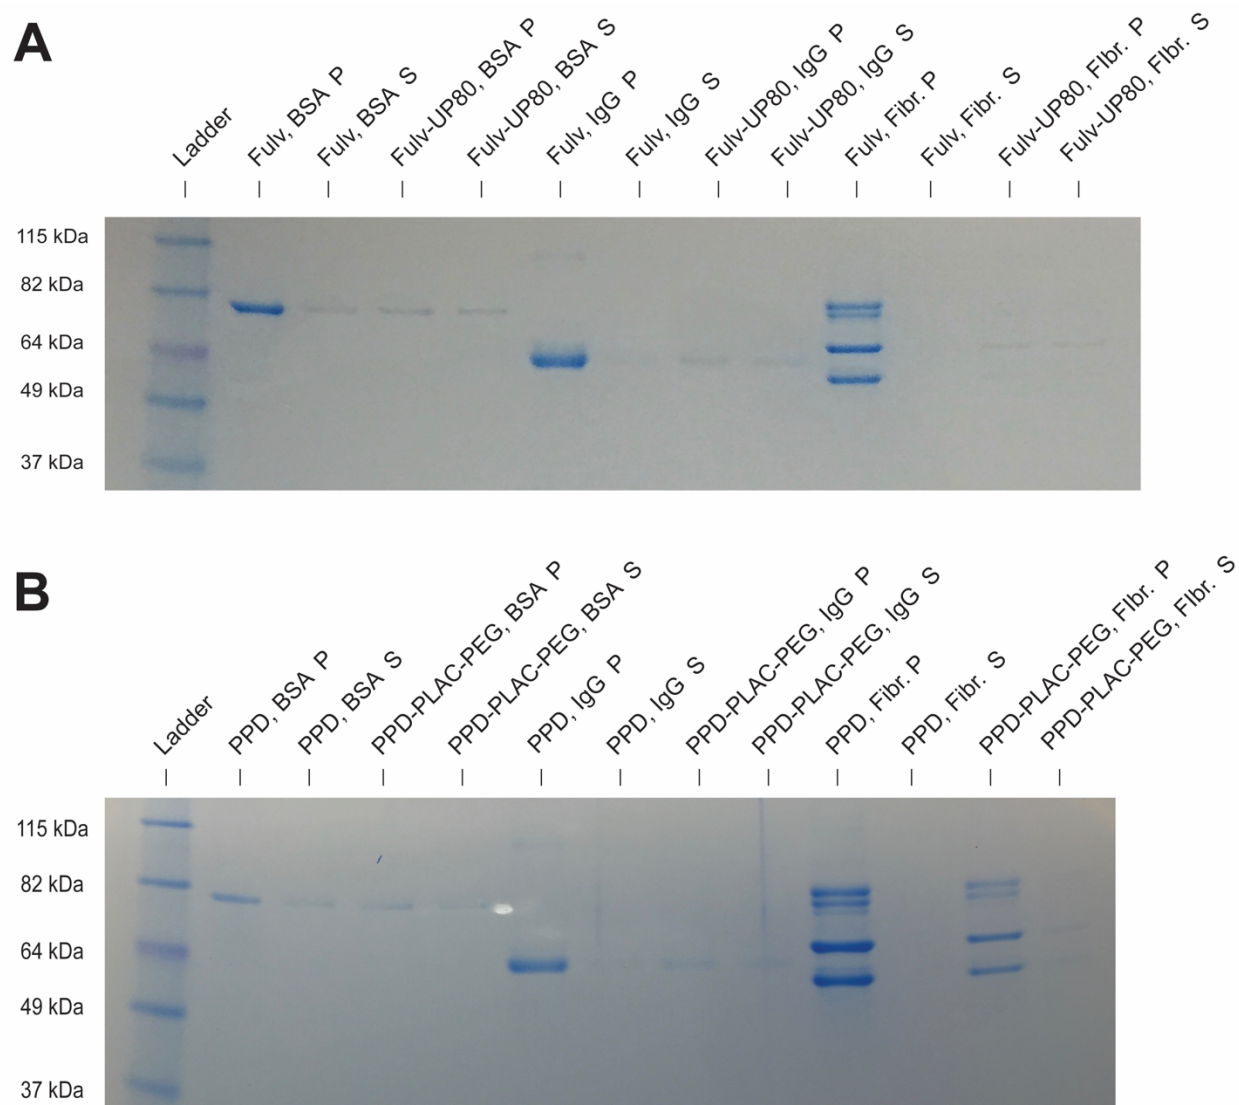

**Figure S6** Representative SDS-PAGE images of (A) fulvestrant and (B) PPD colloids after incubation with 50 nM bovine serum albumin (BSA), immunoglobulin G (IgG) and fibrinogen (Fibr.). Pellet (P) and supernatant (S) fraction were separated by centrifugation of formulation at 16000x g for 1 h at 4 °C. Representative image of 3 repeats.
